# Supplementary material for: The Poly-Glutamate Motif of GmMATE4 Regulates Its Isoflavone Transport Activity
Source: Membranes (Basel). 2022 Feb 10;12(2):206. doi: 10.3390/membranes12020206 (PMC8880658; doi:10.3390/membranes12020206)
Supplement: Supplementary file 1 [file membranes-12-00206-s001.zip › membranes-1563222-supplementary.pdf]

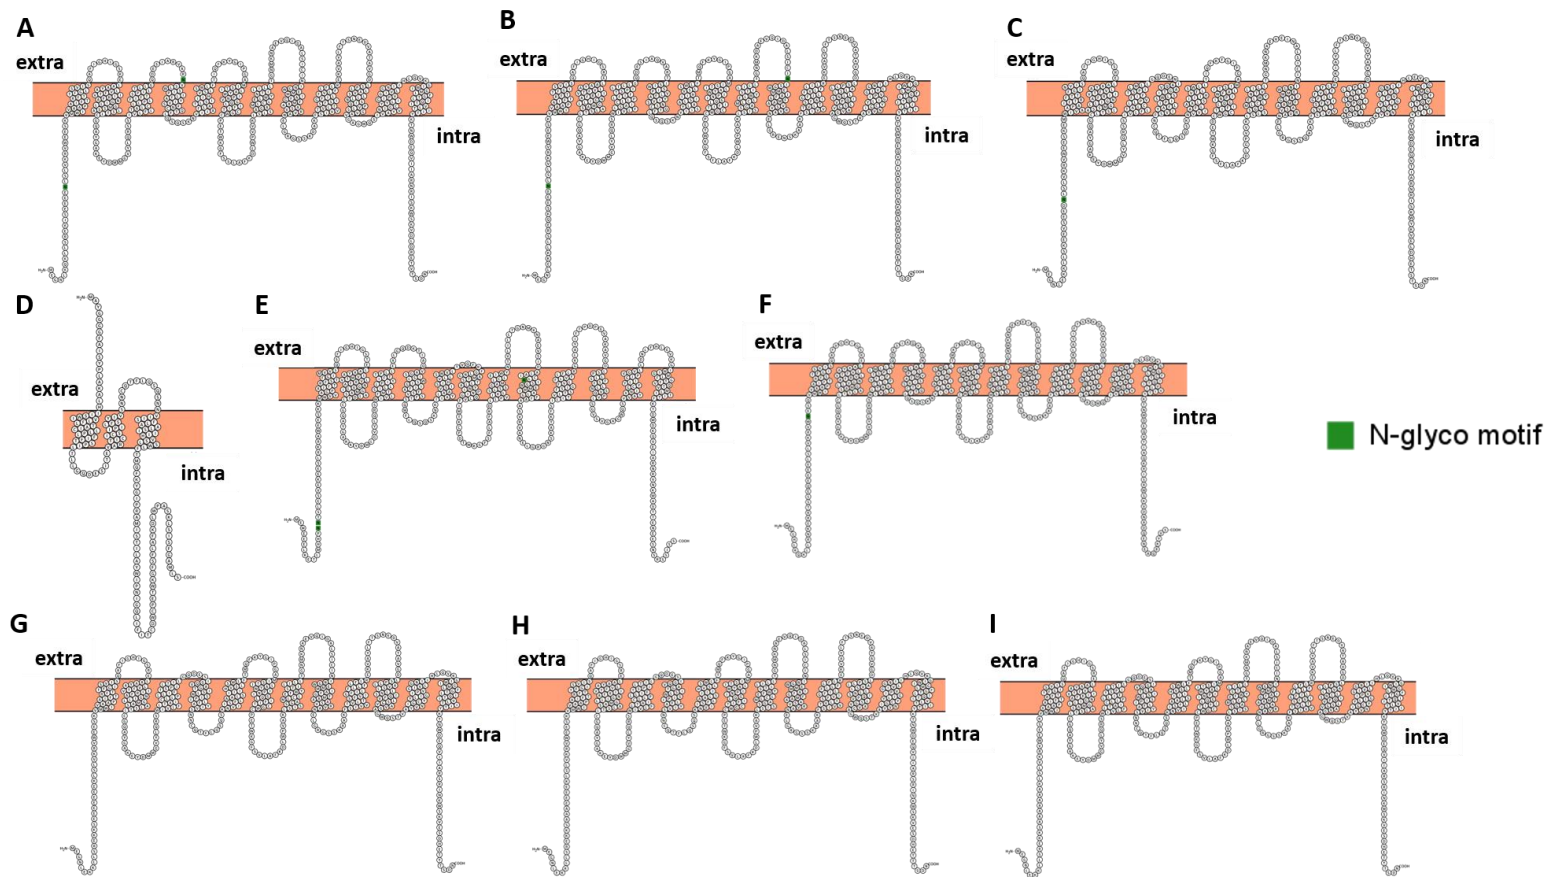

**Figure S1.** The predicted transmembrane topologies of GmMATE transporters. **A.** Glyma.03G005200, **B.** Glyma.03G005300, **C.** Glyma.03G005400, **D.** Glyma.08G244400, **E.** GmMATE1 (Glyma.19G120200), **F.** GmMATE2 (Glyma.19G120300), **G.** GmMATE4 (Glyma.19G120900), **H.** GmMATE4 $\Delta$ 3ala, and **I.** GmMATE4 $\Delta$ 7ala. The transmembrane topologies were predicted using Protter [1].



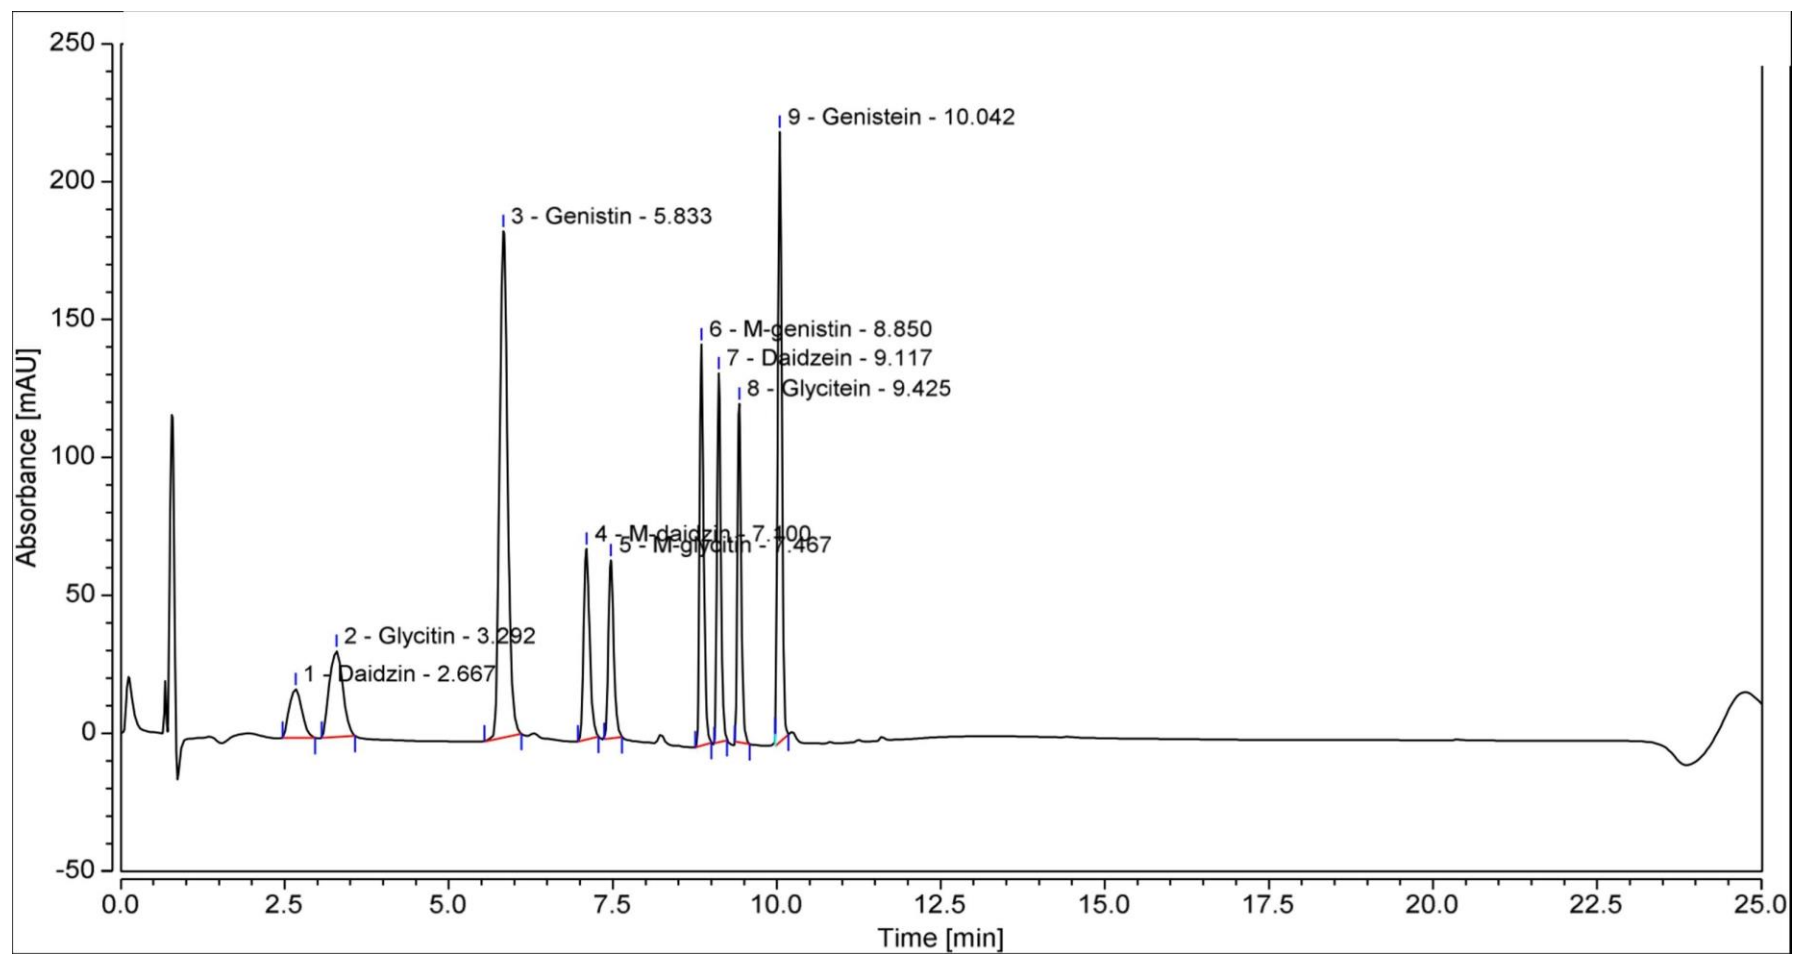

**Figure S3.** A UHPLC chromatogram showing the absorption peaks of the nine isoflavone standards. One microliter of a mixture of the isoflavones at 20ppm each was injected into the UHPLC system. Peak 1: Daidzin; Peak 2: Glycitin; Peak 3: Genistin; Peak 4: Malonyl-daidzin; Peak 5: Malonyl-glycitin; Peak 6: Malonyl-genistin; Peak 7: Daidzein; Peak 8: Glycitein; Peak 9: Genistein.

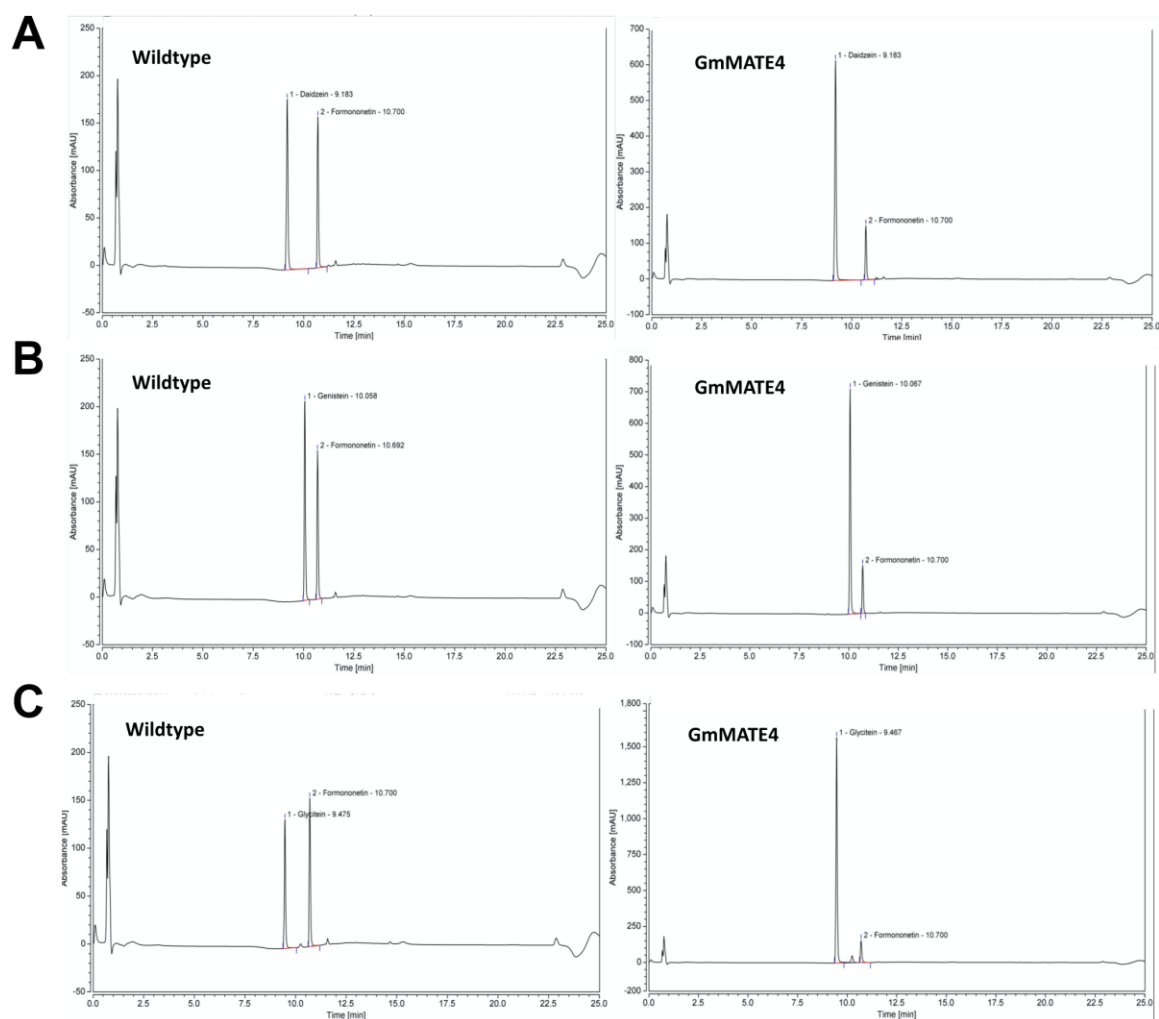

**Figure S4.** Representative UHPLC chromatograms of the detection of isoflavones in the wildtype and *GmMATE4* expressing yeast cells after the treatment with **(A)** daidzein, **(B)** genistein, and **(C)** glycitein.

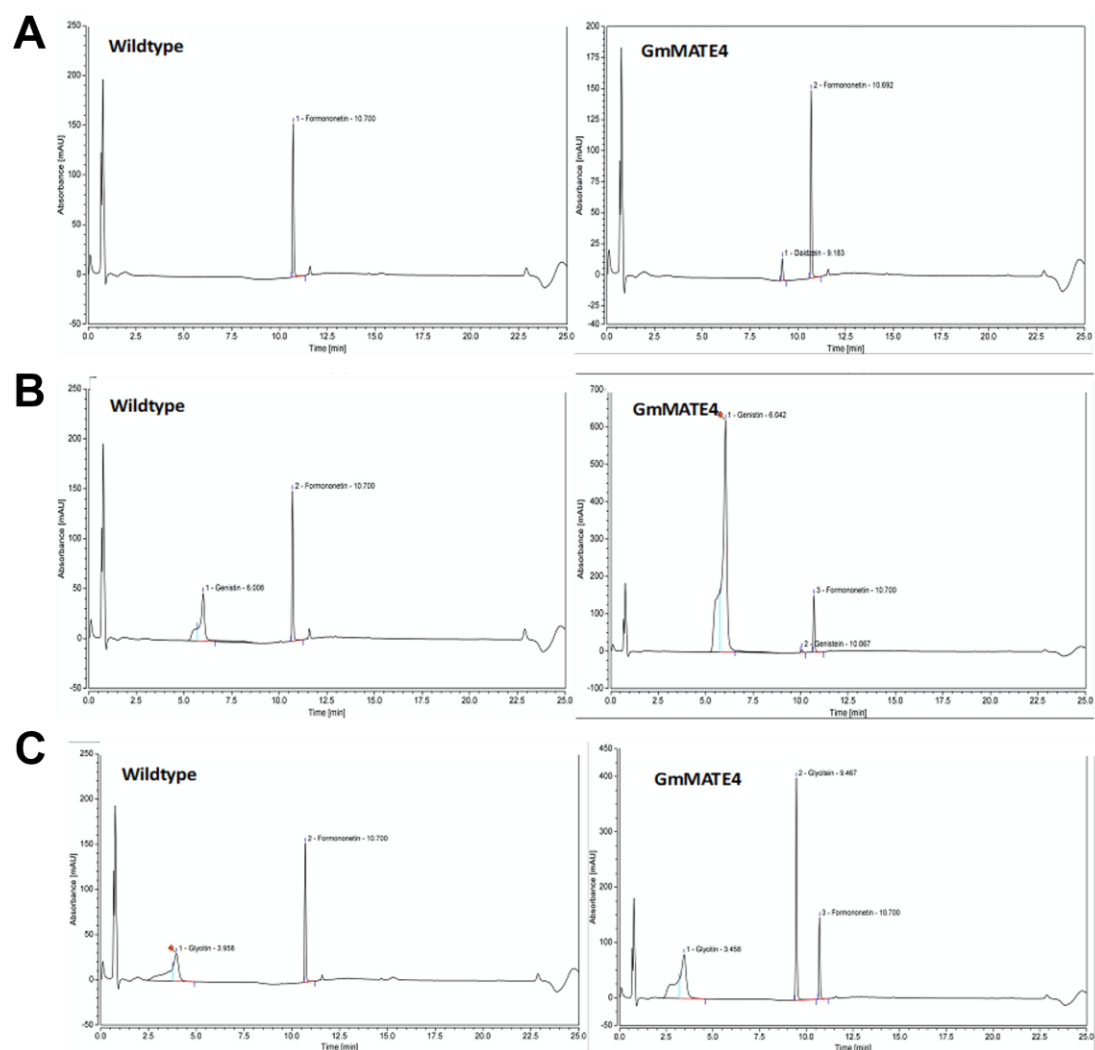

**Figure S5.** Representative UHPLC chromatograms of the detection of isoflavones in the wildtype and *GmMATE4* expressing yeast cells after the treatment with **(A)** daidzin, **(B)** genistin, and **(C)** glycitin.

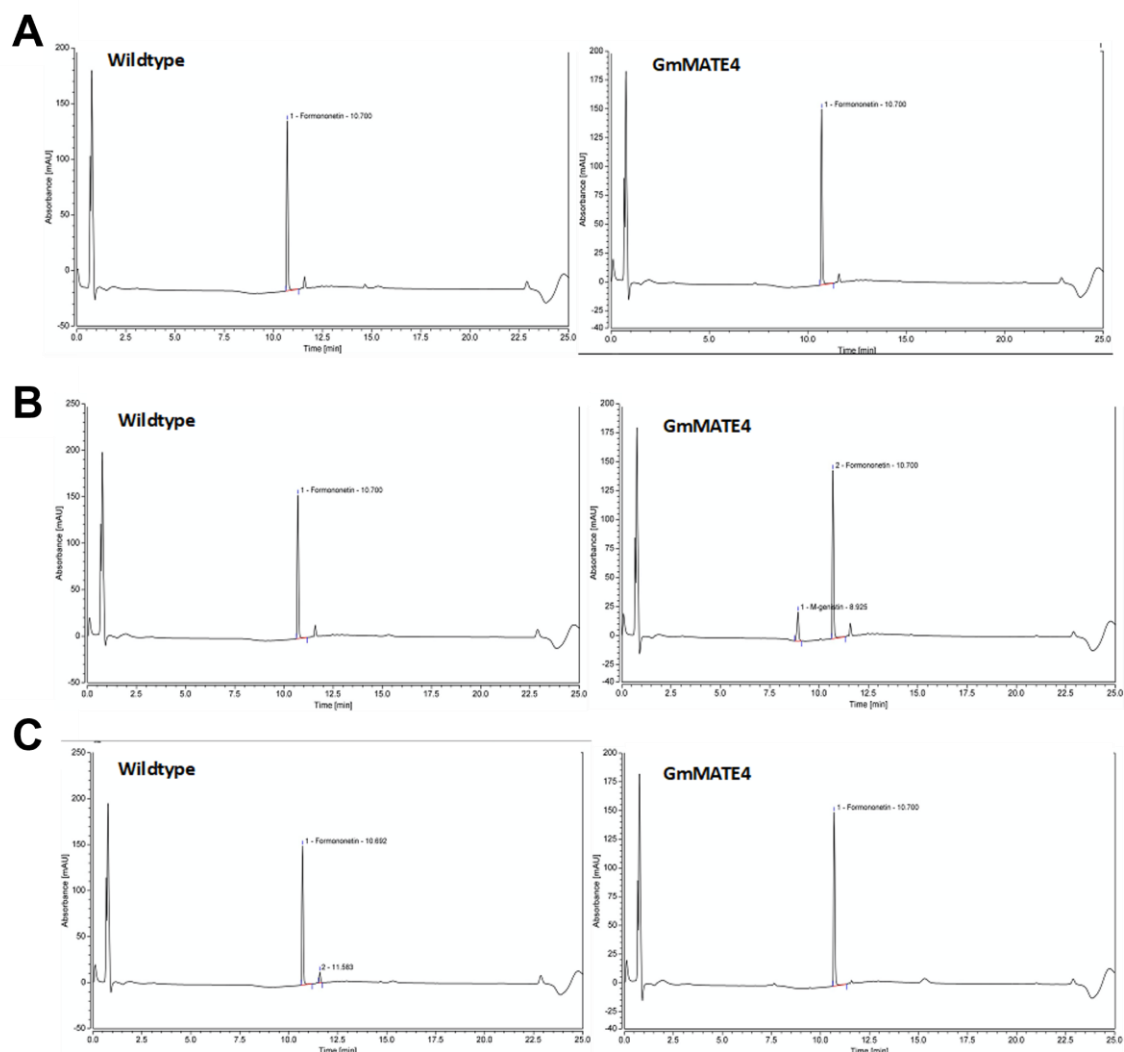

**Figure S6.** Representative UHPLC chromatograms of the detection of isoflavones after the treatment with **(A)** malonyl-daizidin, **(B)** malonyl-genistin, **(C)** and malonyl-glycitin.

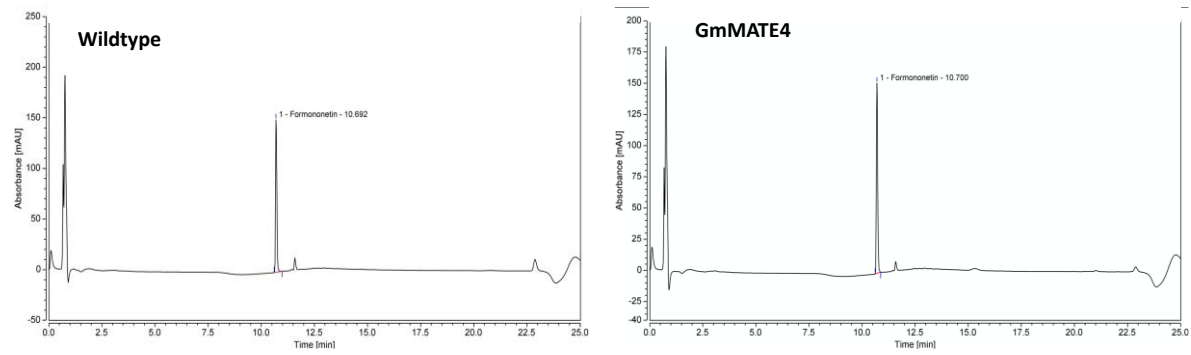

**Figure S7.** Representative UHPLC chromatograms of the detection of isoflavones after the mock treatment.

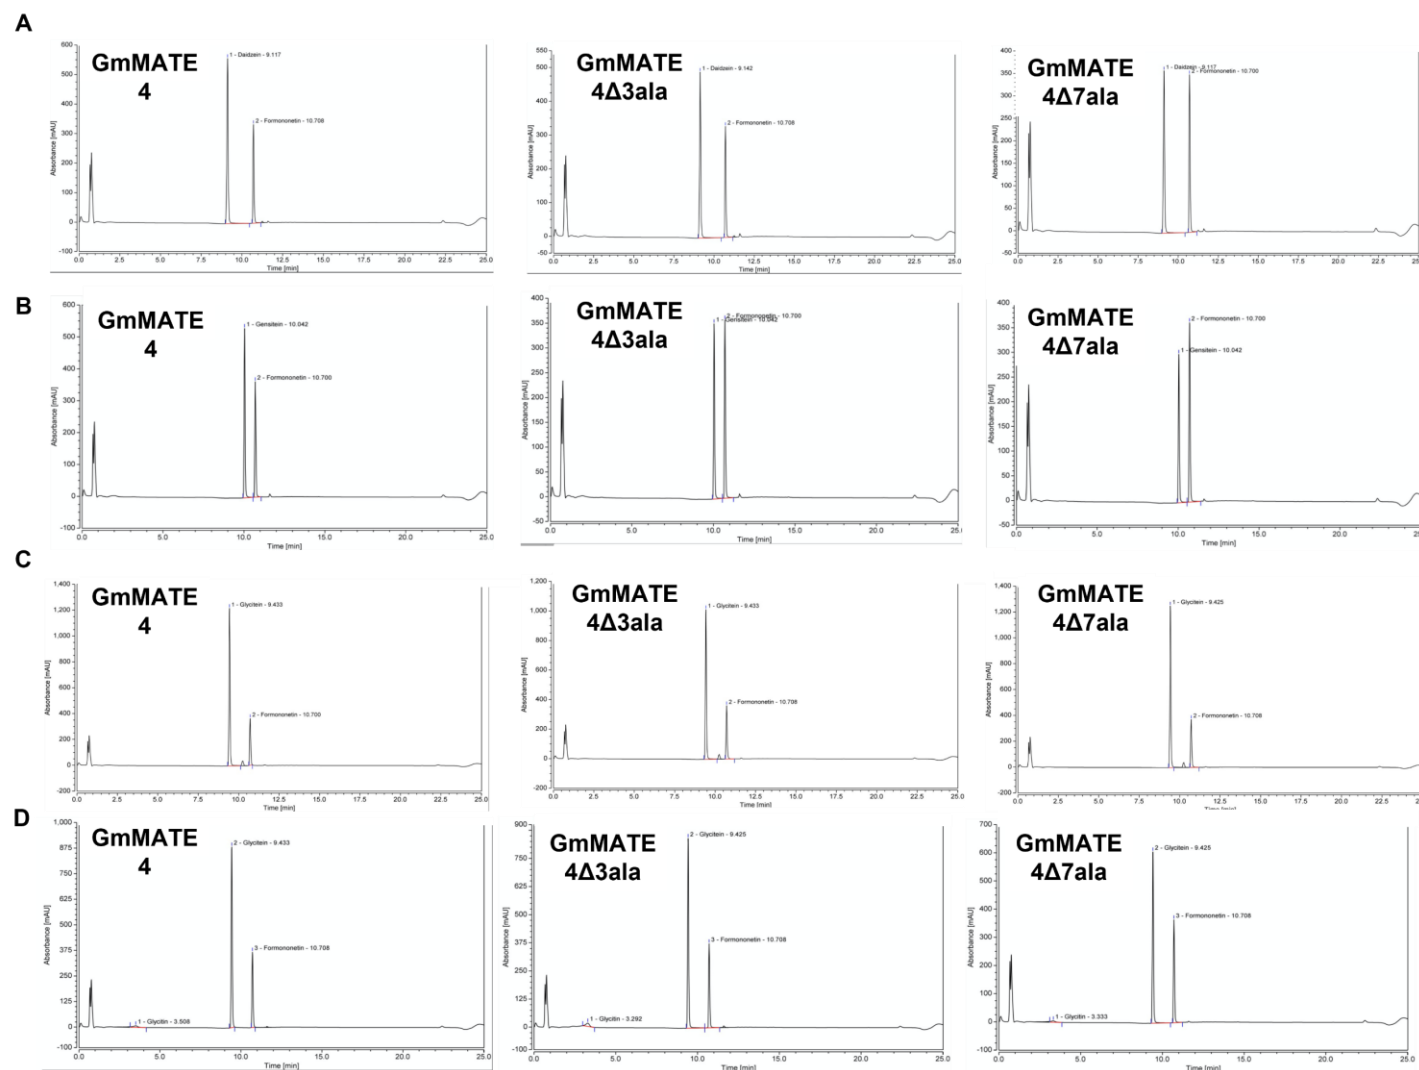

**Figure S8.** Representative UHPLC chromatograms of the detection of isoflavones in *GmMATE4*, *GmMATE4Δ3ala*, or *GmMATE4Δ7ala* expressing yeast cells after the treatment with **(A)** daidzein, **(B)** genistein, **(C)** glycitein, and **(D)** glycitin.

**Table S1.** List of primers and restriction enzymes used for cloning.

| Primers and restriction enzymes                                                                                         | Primer sequences (5' - 3')                                                             |
|-------------------------------------------------------------------------------------------------------------------------|----------------------------------------------------------------------------------------|
| Cloning of <i>GmMATE4</i> from into pGBKT7ΔBD, forward, SmaI                                                            | ACCCGGGAATGGAGGGGAATCTAG                                                               |
| Cloning of <i>GmMATE4</i> from into pGBKT7ΔBD, reverse, Sall                                                            | AAAGTCGACCTAATTATCTGATGTAGTTG                                                          |
| Cloning of <i>GmMATE4Δ3ala</i> into pGBKT7ΔBD, forward                                                                  | AATGGAGGGGAATCTAGAGAAGAAGCTGTTGA<br>GCAGAGAAAAAATCAGCTGCTGCTGAAGAA<br>GAAGAGAAA        |
| Cloning of <i>GmMATE4Δ3ala</i> and <i>GmMATE4Δ7ala</i> into pGBKT7ΔBD, reverse, Sall                                    | AAGTCGACCTAATTATCTGATGTAGTTGTTTCAT<br>GATCAGATTCCAC                                    |
| Cloning of <i>GmMATE4Δ7ala</i> into pGBKT7ΔBD, forward                                                                  | AATGGAGGGGAATCTAGAGAAGAAGCTGTTGA<br>GCAGAGAAAAAATCAGCTGCTGCTGCTGCTG<br>CTGCTAAATTATCAT |
| Cloning of <i>GmMATE4</i> , <i>GmMATE4Δ3ala</i> and <i>GmMATE4Δ7ala</i> for fusing with <i>GFP</i> in V7, forward, NheI | AAAAAGCTAGCATGGAGGGGAATCTAG                                                            |
| Cloning of <i>GmMATE4</i> , <i>GmMATE4Δ3ala</i> and <i>GmMATE4Δ7ala</i> for fusing with <i>GFP</i> in V7, reverse, XhoI | AAAAACTCGAGATTATCTGATGTAGTTG                                                           |

## References

1. Omasits, U.; Ahrens, C.H.; Müller, S.; Wollscheid, B. Protter: Interactive protein feature visualization and integration with experimental proteomic data. *Bioinformatics* **2014**, *30*, 884–886.
2. Tamura, K.; Stecher, G.; Kumar, S. MEGA11: Molecular evolutionary genetics analysis version 11. *Mol. Biol. Evol.* **2021**, *38*, 3022–3027.
